1 **Evaluation of plasma N-terminal pro-B-type natriuretic peptide levels in healthy**  
2 **North American Salukis with normal echocardiographic measurements.**

3

4 Christopher Brennan<sup>1¶</sup>, Tamilselvam Gunasekaran<sup>1¶</sup>, Robert A Sanders<sup>1¶</sup>

5 <sup>1</sup> Department of Small Animal Clinical Sciences, College of Veterinary Medicine, East  
6 Lansing, Michigan, United States of America

7

8 \*Corresponding Author:

9 E-mail: [ras@msu.edu](mailto:ras@msu.edu) (RAS)

10

11 <sup>¶</sup> These authors contributed equally to this work.

12

13

14

15

16

17

18

19

20

21

22

23

## 24 **Abstract**

25           Measurement of N-terminal pro-B-type natriuretic peptide (NT-proBNP) levels has  
26 been shown to have clinical significance for diagnosis and management of heart disease  
27 in dogs. Evaluation of current reference limits for specific breeds is necessary to ensure  
28 the test can accurately distinguish between healthy and diseased animals. The objective  
29 of this study is to evaluate the adequacy of currently established NT-proBNP reference  
30 limits for clinical use in healthy Salukis. Cardiac health of 33 clinically healthy Salukis was  
31 evaluated via echocardiography using available breed standards. Plasma concentrations  
32 of NT-proBNP were measured using a commercially available assay. A one-sided 97.5  
33 % upper reference limit for the NT-proBNP concentrations was calculated using non-  
34 parametric percentile method. The 97.5 % upper reference limit was 769 pmol/L (90% CI,  
35 547-1214 pmol/L) for the study dogs. This upper reference limit was within the currently  
36 established non-breed specific NT-proBNP upper reference limit of 900 pmol/L. No  
37 relationship between sex, age, or body weight on plasma levels of NT-proBNP was noted.  
38 Results of this study supports the use of currently available non-breed specific NT-  
39 proBNP cut-off values for clinical evaluation of healthy Salukis.

## 40 **Introduction**

41           Initial evaluation of cardiac disease in veterinary patients has traditionally lacked a  
42 readily accessible and objective method of quantitative evaluation. Methods such as,  
43 electrocardiography, thoracic radiography and echocardiography can be inaccessible to  
44 clinicians and owners alike. In humans, evaluation of natriuretic peptide levels has been  
45 widely used for quantitative assessment of various cardiac diseases. In human patients

46 with heart failure, natriuretic peptides not only have utility as a diagnostic tool but can also  
47 be used to develop prognoses and inform treatment strategies [1-2]. Natriuretic peptides  
48 have also been used in the management of structural heart diseases, acute coronary  
49 syndromes, and atrial fibrillation in human patients. [1-3].

50

51         Recent research has suggested N-terminal pro B-type natriuretic peptide (NT-  
52 proBNP), as a useful biomarker for similar quantitative evaluation of various cardiac  
53 diseases in dogs [4-18]. One such purpose is differentiating between cardiac and non-  
54 cardiac causes of respiratory distress in canine and feline patients [5-10]. Research has  
55 also shown value in using NT-proBNP levels for monitoring and prediction of mortality in  
56 cases of myxomatous mitral valve degeneration [4, 11-16]. Furthermore, increased NT-  
57 proBNP concentrations have been associated with dilated cardiomyopathy and may have  
58 the potential to be used to screen for the disease in Doberman Pinschers [17-18].

59

60         Several veterinary studies have highlighted breed specific differences in  
61 echocardiographic measurements especially in sight hounds such as Greyhounds [22-  
62 23]. Greyhounds have unique echocardiographic indices and a higher heart weight to  
63 body weight ratio when compared with other breeds; they have also been found to have  
64 larger vertebral heart sizes than other breeds. [20, 22-23, 26-27]. Changes in  
65 echocardiographic variables appear to persist even in non-racing Greyhounds [23].  
66 Greyhounds also have several biochemical analytes that differ significantly from other  
67 breeds, including higher than average cardiac troponin levels and plasma NT-proBNP  
68 levels in healthy, retired racing dogs [24, 27-28]. Much like Greyhounds, normal Salukis

69 have also been found to have unique echocardiographic measurements that are different  
70 from other breeds [20-21]. Given the variability among breeds as a whole and given that  
71 a related breed with similarly unique echocardiographic indices appears to have  
72 significantly increased levels of plasma NT-proBNP, there is merit in evaluating circulating  
73 NT-proBNP in the Saluki dogs.

74

75 The goal of this study was to evaluate currently available NT-proBNP assay  
76 reference limits for use in healthy Saluki dogs with normal echocardiographic  
77 measurements. It was hypothesized that Salukis would have elevated NT-proBNP  
78 concentrations when compared to currently available reference cutoffs.

## 79 **Materials and Methods**

### 80 **Animals**

81 Animals were included in the study if they were clinically healthy and had  
82 echocardiographically normal measurements established for purebred Salukis [20-21].  
83 Echocardiographic examinations were performed as previously described and results  
84 were compared to breed-specific normal ranges [20-21]. All animals were evaluated at  
85 one of two Saluki Club of America National Specialty Shows. The study was conducted  
86 under the guidelines of [masked for review]. Written informed consent authorizing study  
87 participation was obtained from participating owners.

### 88 **Blood sample collection and NT-pro BNP analysis**

89 Blood was sampled via venipuncture of external jugular vein, collected in 5 mL  
90 EDTA tubes, centrifuged at 2500 RPM, and supernatant stored in a freezer at -20° C.

91 Samples were shipped in two separate batches over dry ice to a commercial laboratory  
92 for analysis. Samples were analyzed using a commercially available second-generation  
93 ELISA test (Canine Cardiopet® proBNP test kit, IDEXX Laboratories Inc., Westbrook,  
94 ME.). The test has been previously validated for use in dogs [25].

## 95 **Statistical Methods**

96 Statistical analysis was performed using commercially available software  
97 (MATLAB, Version 9.8 (R2020a), Natick, Massachusetts: The MathWorks Inc.).  
98 Distribution of NT-pro BNP concentrations was assessed for normality using the Shapiro-  
99 Wilk test. Due to non-normal distribution, plasma NT-proBNP concentrations were  
100 presented using medians and interquartile ranges. The Mann-Whitney U test was used  
101 to compare NT-proBNP concentrations between sexes. Simple linear regression analysis  
102 was performed to assess for association between age and serum concentrations of NT-  
103 proBNP. The 97.5% upper reference limit was estimated by using a bootstrap method  
104 (The dataset was iteratively sampled 10,000 times with replacement). A 90% confidence  
105 interval around the upper reference limit was constructed in an identical fashion.

## 106 **Results**

107 Forty-three dogs were initially evaluated, with 33 dogs included in the final  
108 analysis. Ten dogs were excluded for abnormalities noted during the echocardiographic  
109 exam, including mitral regurgitation, aortic regurgitation and tricuspid regurgitation.  
110 Eighteen of the dogs were female and fifteen were male. The median age was 54 months  
111 (IQR = 43 mos, P25 = 26.5 mos, P50 = 69.3 mos). The median weight of the dogs was  
112 21.9 kg (IQR = 2.9 kg, P25 = 20.3kg, P50 = 23.2kg)

113

114 The median plasma NT-proBNP concentration was 250 pmol/L (IQR = 93.5  
115 pmol/L, P25 = 250 pmol/L, P75 = 250 pmol/L, see **Fig 1**). The majority of samples (24 out  
116 of 33, 72.7%) measured at the lower limit for detection for the assay used in this study  
117 (i.e. 250 pmol/L). The 97.5<sup>th</sup> percentile (upper reference limit) was 769 pmol/L (90%  
118 Confidence Interval, 547 - 1214 pmol/L). There was no significant difference in plasma  
119 NT-proBNP concentrations between male and female dogs ( $p = 0.9$ ). There was no  
120 significant correlation between age and plasma NT-proBNP concentrations ( $r = 0.19$ ,  $p =$   
121  $0.29$ ) nor between body weight and plasma NT-proBNP concentrations ( $r = -0.19$ ,  $p$   
122  $= 0.29$ ).

123

124 **Fig. 1: Boxplot of NT-proBNP concentrations in 33 healthy Salukis.** The red bottom  
125 line denotes both the median value and lower quartile (250pmol/L), while the top of the  
126 box denotes the upper quartile. The black whisker marks the highest value that is not an  
127 outlier, and values beyond this upper bound are marked with plus signs (+).

## 128 Discussion

129 Measurement of plasma NT-proBNP concentrations presents a potentially useful  
130 screening tool when evaluating the dogs for heart disease. Current commercially  
131 available tests for use in the general canine population utilize a reference interval  
132 constructed from many dogs of various breeds [5]. However, considerable variability in  
133 plasma NT-proBNP concentrations has been noted between breeds [19], suggesting  
134 merit in evaluating NT-proBNP concentrations on a breed-by-breed basis.

135

136 To our knowledge, plasma levels of NT-proBNP have not been previously  
137 evaluated in Salukis. This study intended to evaluate NT-proBNP concentrations in  
138 apparently healthy Salukis in comparison with currently used non-breed specific  
139 reference ranges which have an upper cut-off of 900 pmol/L. The results of this study  
140 support use of a cutoff of 900 pmol/L in Salukis, as this value falls within the 90%  
141 confidence interval of the calculated 95<sup>th</sup> percentile.

142

143 The current study has several limitations including small sample size. Furthermore,  
144 while best efforts were made to rule out other systemic illness, no clinicopathologic  
145 diagnostics were used to make these decisions, nor was follow up performed on any of  
146 the dogs. It is therefore possible that animals with higher NT-proBNP levels had occult  
147 cardiac or other systemic illness that was not apparent on physical examination.

148

149 Finally, the test used in the current study cannot detect serum NT-proBNP  
150 concentrations below 250 pmol/L, and a large proportion of samples returned measuring  
151 at this low cutoff value. As a result, the specific concentrations of NT-proBNP in many of  
152 the collected samples remain unknown, as their true values could be anywhere from  
153 250pmol/L or below. This does not prove to be an issue in a clinical setting, as a low NT-  
154 proBNP concentration is not of any clinical significance. However, in the setting of this  
155 study, the lack of sample diversity precludes generation of a true reference interval, as  
156 the recommended logarithmic transformation and robust evaluation of the data is  
157 impossible [29].

158

159            Interestingly, the 97.5% percentile upper limit calculated in this study is lower than  
160 the assay upper limit of 900 pmol/L. This would be an important distinction when  
161 screening for cardiac disease in the breed. Say, for example, if a true reference interval  
162 is generated with an upper limit that is significantly lower than 900 pmol/L. In this scenario,  
163 an increased NT-proBNP level in a diseased Saluki could be misinterpreted as a normal  
164 concentration when using the standard reference limit. As such, more work is required to  
165 determine a true breed-specific NT-proBNP reference range.

## 166 **Conclusion**

167            Most healthy Saluki dogs have NT-proBNP concentrations that confirm to the  
168 currently established upper reference limit for the commercial assay. However, further  
169 research is needed to evaluate the adequacy of NT-proBNP upper reference limits in  
170 differentiating Saluki's with and without cardiac disease by establishing true reference  
171 limits.

## 172 **Acknowledgements**

173            The authors don't have any conflicts of interest to disclose.

## 174 **References**

- 175            1. Maries L, Manitiu I. Diagnostic and prognostic values of B-type natriuretic peptides  
176            (BNP) and N-terminal fragment brain natriuretic peptides (NT-pro-BNP).  
177            Cardiovasc J Afr. 2013 Aug;24(7):286-9. doi: 10.5830/CVJA-2013-055. PMID:  
178            24217307; PMCID: PMC3807675.



- 179        2. Chow SL, Maisel AS, Anand I, Bozkurt B, de Boer RA, Felker GM, et.al. American  
180        Heart Association Clinical Pharmacology Committee of the Council on Clinical  
181        Cardiology; Council on Basic Cardiovascular Sciences; Council on Cardiovascular  
182        Disease in the Young; Council on Cardiovascular and Stroke Nursing; Council on  
183        Cardiopulmonary, Critical Care, Perioperative and Resuscitation; Council on  
184        Epidemiology and Prevention; Council on Functional Genomics and Translational  
185        Biology; and Council on Quality of Care and Outcomes Research. Role of  
186        Biomarkers for the Prevention, Assessment, and Management of Heart Failure: A  
187        Scientific Statement From the American Heart Association. *Circulation*. 2017 May  
188        30;135(22):e1054-e1091. doi: 10.1161/CIR.0000000000000490. Epub 2017 Apr  
189        26. Erratum in: *Circulation*. 2017 Nov 7;136(19):e345. PMID: 28446515.
- 190        3. Hijazi Z, Oldgren J, Siegbahn A, Granger CB, Wallentin L. Biomarkers in atrial  
191        fibrillation: a clinical review. *Eur Heart J*. 2013 May;34(20):1475-80. doi:  
192        10.1093/eurheartj/eh024. Epub 2013 Feb 5. PMID: 23386711.
- 193        4. Oyama MA, Fox PR, Rush JE, Rozanski EA, Lesser M. Clinical utility of serum N-  
194        terminal pro-B-type natriuretic peptide concentration for identifying cardiac disease  
195        in dogs and assessing disease severity. *J Am Vet Med Assoc*. 2008 May  
196        15;232(10):1496-503. doi: 10.2460/javma.232.10.1496. PMID: 18479239.
- 197        5. Haßdenteufel E, Kresken JG, Henrich E, Hildebrandt N, Schneider C, Stosic A,  
198        et.al. NT-proBNP in der Diagnostik bei Hunden mit Dyspnoe und  
199        asymptomatischen Hunden mit Herzgeräusch [NT-proBNP as a diagnostic marker  
200        in dogs with dyspnea and in asymptomatic dogs with heart murmur]. *Tierarztl Prax*  
201        Ausg K Kleintiere Heimtiere. 2012;40(3):171-9. German. PMID: 22688794.

- 202 6. Oyama MA, Rush JE, Rozanski EA, Fox PR, Reynolds CA, Gordon SG, et.al.  
203 Assessment of serum N-terminal pro-B-type natriuretic peptide concentration for  
204 differentiation of congestive heart failure from primary respiratory tract disease as  
205 the cause of respiratory signs in dogs. *J Am Vet Med Assoc.* 2009 Dec  
206 1;235(11):1319-25. doi: 10.2460/javma.235.11.1319. PMID: 19951101.
- 207 7. Prosek R, Sisson DD, Oyama MA, Solter PF. Distinguishing cardiac and  
208 noncardiac dyspnea in 48 dogs using plasma atrial natriuretic factor, B-type  
209 natriuretic factor, endothelin, and cardiac troponin-I. *J Vet Intern Med.* 2007 Mar-  
210 Apr;21(2):238-42. doi: 10.1892/0891-6640(2007)21[238:dcandi]2.0.co;2. PMID:  
211 17427383.
- 212 8. Fine DM, DeClue AE, Reiner CR. Evaluation of circulating amino terminal-pro-B-  
213 type natriuretic peptide concentration in dogs with respiratory distress attributable  
214 to congestive heart failure or primary pulmonary disease. *J Am Vet Med Assoc.*  
215 2008 Jun 1;232(11):1674-9. doi: 10.2460/javma.232.11.1674. PMID: 18518809.
- 216 9. DeFrancesco TC, Rush JE, Rozanski EA, Hansen BD, Keene BW, Moore DT,  
217 et.al. Prospective clinical evaluation of an ELISA B-type natriuretic peptide assay  
218 in the diagnosis of congestive heart failure in dogs presenting with cough or  
219 dyspnea. *J Vet Intern Med.* 2007 Mar-Apr;21(2):243-50. doi: 10.1892/0891-  
220 6640(2007)21[243:pceoae]2.0.co;2. PMID: 17427384.
- 221 10. Oyama MA, Singletary GE. The use of NT-proBNP assay in the management of  
222 canine patients with heart disease. *Vet Clin North Am Small Anim Pract.* 2010  
223 Jul;40(4):545-58. doi: 10.1016/j.cvsm.2010.03.004. PMID: 20610010.

- 224 11. Ebisawa T, Ohta Y, Funayama M, Morita K, Uechi M. Clinical Use of N-terminal  
225 Pro-Brain Natriuretic Peptide Concentrations for Assessing the Severity and  
226 Prognosis of Myxomatous Mitral Valve Disease in Dogs. *International Journal of*  
227 *Applied Research in Veterinary Medicine*. 2012 Jul 1;10(3).
- 228 12. Reynolds CA, Brown DC, Rush JE, Fox PR, Nguyenba TP, Lehmkuhl LB, et.al.  
229 Prediction of first onset of congestive heart failure in dogs with degenerative mitral  
230 valve disease: the PREDICT cohort study. *J Vet Cardiol*. 2012 Mar;14(1):193-202.  
231 doi: 10.1016/j.jvc.2012.01.008. Epub 2012 Feb 25. PMID: 22366568.
- 232 13. Chetboul V, Serres F, Tissier R, Lefebvre HP, Sampedrano CC, Gouni V, et.al.  
233 Association of plasma N-terminal pro-B-type natriuretic peptide concentration with  
234 mitral regurgitation severity and outcome in dogs with asymptomatic degenerative  
235 mitral valve disease. *J Vet Intern Med*. 2009 Sep-Oct;23(5):984-94. doi:  
236 10.1111/j.1939-1676.2009.0347.x. Epub 2009 Jul 1. PMID: 19572913.
- 237 14. Tarnow I, Olsen LH, Kvarn C, Hoglund K, Moesgaard SG, Kamstrup TS, et.al.  
238 Predictive value of natriuretic peptides in dogs with mitral valve disease. *Vet J*.  
239 2009 May;180(2):195-201. doi: 10.1016/j.tvjl.2007.12.026. PMID: 18675567.
- 240 15. Hezzell MJ, Boswood A, Chang YM, Moonarmart W, Souttar K, Elliott J. The  
241 combined prognostic potential of serum high-sensitivity cardiac troponin I and N-  
242 terminal pro-B-type natriuretic peptide concentrations in dogs with degenerative  
243 mitral valve disease. *J Vet Intern Med*. 2012 Mar-Apr;26(2):302-11. doi:  
244 10.1111/j.1939-1676.2012.00894.x. Epub 2012 Feb 28. PMID: 22369312.
- 245 16. Serres F, Pouchelon JL, Poujol L, Lefebvre HP, Trumel C, Daste T, et.al. Plasma  
246 N-terminal pro-B-type natriuretic peptide concentration helps to predict survival in

- 247 dogs with symptomatic degenerative mitral valve disease regardless of and in  
248 combination with the initial clinical status at admission. *J Vet Cardiol.* 2009  
249 Dec;11(2):103-21. doi: 10.1016/j.jvc.2009.07.001. Epub 2009 Oct 21. PMID:  
250 19850546.
- 251 17. Oyama MA, Sisson DD, Solter PF. Prospective screening for occult  
252 cardiomyopathy in dogs by measurement of plasma atrial natriuretic peptide, B-  
253 type natriuretic peptide, and cardiac troponin-I concentrations. *Am J Vet Res.* 2007  
254 Jan;68(1):42-7. doi: 10.2460/ajvr.68.1.42. PMID: 17199417.
- 255 18. Wess G, Butz V, Mahling M, Hartmann K. Evaluation of N-terminal pro-B-type  
256 natriuretic peptide as a diagnostic marker of various stages of cardiomyopathy in  
257 Doberman Pinschers. *Am J Vet Res.* 2011 May;72(5):642-9. doi:  
258 10.2460/ajvr.72.5.642. PMID: 21529216.
- 259 19. Sjöstrand K, Wess G, Ljungvall I, Häggström J, Merveille AC, Wiberg M, et.al.  
260 Breed differences in natriuretic peptides in healthy dogs. *J Vet Intern Med.* 2014  
261 Mar-Apr;28(2):451-7. doi: 10.1111/jvim.12310. Epub 2014 Feb 3. PMID:  
262 24495256; PMCID: PMC4857989.
- 263 20. Kurosawa TA, Sist MD, Sanders RA. Echocardiographic variables in healthy North  
264 American Salukis. *J Vet Cardiol.* 2018 Oct;20(5):301-306. doi:  
265 10.1016/j.jvc.2018.07.003. Epub 2018 Aug 20. PMID: 30139649.
- 266 21. Giraut S, Häggström J, Koskinen LLE, Lohi H, Wiberg M. Breed-specific  
267 reference ranges for standard echocardiographic measurements in salukis. *J*  
268 *Small Anim Pract.* 2019 Jun;60(6):374-378. doi: 10.1111/jsap.12975. Epub 2019  
269 Jan 31. PMID: 30701551.

- 270 22. Page A, Edmunds G, Atwell RB. Echocardiographic values in the greyhound.  
271 Aust Vet J. 1993 Oct;70(10):361-4. doi: 10.1111/j.1751-0813.1993.tb00808.x.  
272 PMID: 8257312.
- 273 23. Snyder PS, Sato T, Atkins CE. A comparison of echocardiographic indices of the  
274 nonracing, healthy greyhound to reference values from other breeds. Veterinary  
275 Radiology & Ultrasound. 1995 Sep;36(5):387-92.
- 276 24. Couto KM, Iazbik MC, Marín LM, Zaldivar-López S, Beal MJ, Gómez Ochoa P,  
277 et.al. Plasma N-terminal pro-B-type natriuretic peptide concentration in healthy  
278 retired racing Greyhounds. Vet Clin Pathol. 2015 Sep;44(3):405-9. doi:  
279 10.1111/vcp.12266. Epub 2015 May 14. PMID: 25982692.
- 280 25. Cahill RJ, Pigeon K, Strong-Townsend MI, Drexel JP, Clark GH, Buch JS.  
281 Analytical validation of a second-generation immunoassay for the quantification  
282 of N-terminal pro-B-type natriuretic peptide in canine blood. J Vet Diagn Invest.  
283 2015 Jan;27(1):61-7. doi: 10.1177/1040638714562826. PMID: 25525139.
- 284 26. Marin LM, Brown J, McBrien C, Baumwart R, Samii VF, Couto CG. Vertebral  
285 heart size in retired racing Greyhounds. Vet Radiol Ultrasound. 2007 Jul-  
286 Aug;48(4):332-4. doi: 10.1111/j.1740-8261.2007.00252.x. PMID: 17691632.
- 287 27. Zaldivar-López S, Marín LM, Iazbik MC, Westendorf-Stingle N, Hensley S,  
288 Couto CG. Clinical pathology of Greyhounds and other sighthounds. Vet Clin  
289 Pathol. 2011 Dec;40(4):414-425. doi: 10.1111/j.1939-165X.2011.00360.x. Epub  
290 2011 Oct 24. PMID: 22092909; PMCID: PMC3816276.
- 291 28. LaVecchio D, Marin LM, Baumwart R, Iazbik MC, Westendorf N, Couto CG.  
292 Serum cardiac troponin I concentration in retired racing greyhounds. J Vet Intern

293 Med. 2009 Jan-Feb;23(1):87-90. doi: 10.1111/j.1939-1676.2008.0237.x. PMID:  
294 19175726.

295 29. Friedrichs KR, Harr KE, Freeman KP, Szladovits B, Walton RM, Barnhart  
296 KF, et al. American Society for Veterinary Clinical Pathology. ASVCP reference  
297 interval guidelines: determination of de novo reference intervals in veterinary  
298 species and other related topics. Vet Clin Pathol. 2012 Dec;41(4):441-53. doi:  
299 10.1111/vcp.12006. PMID: 23240820.

# Distribution of Plasma NT-proBNP Concentrations

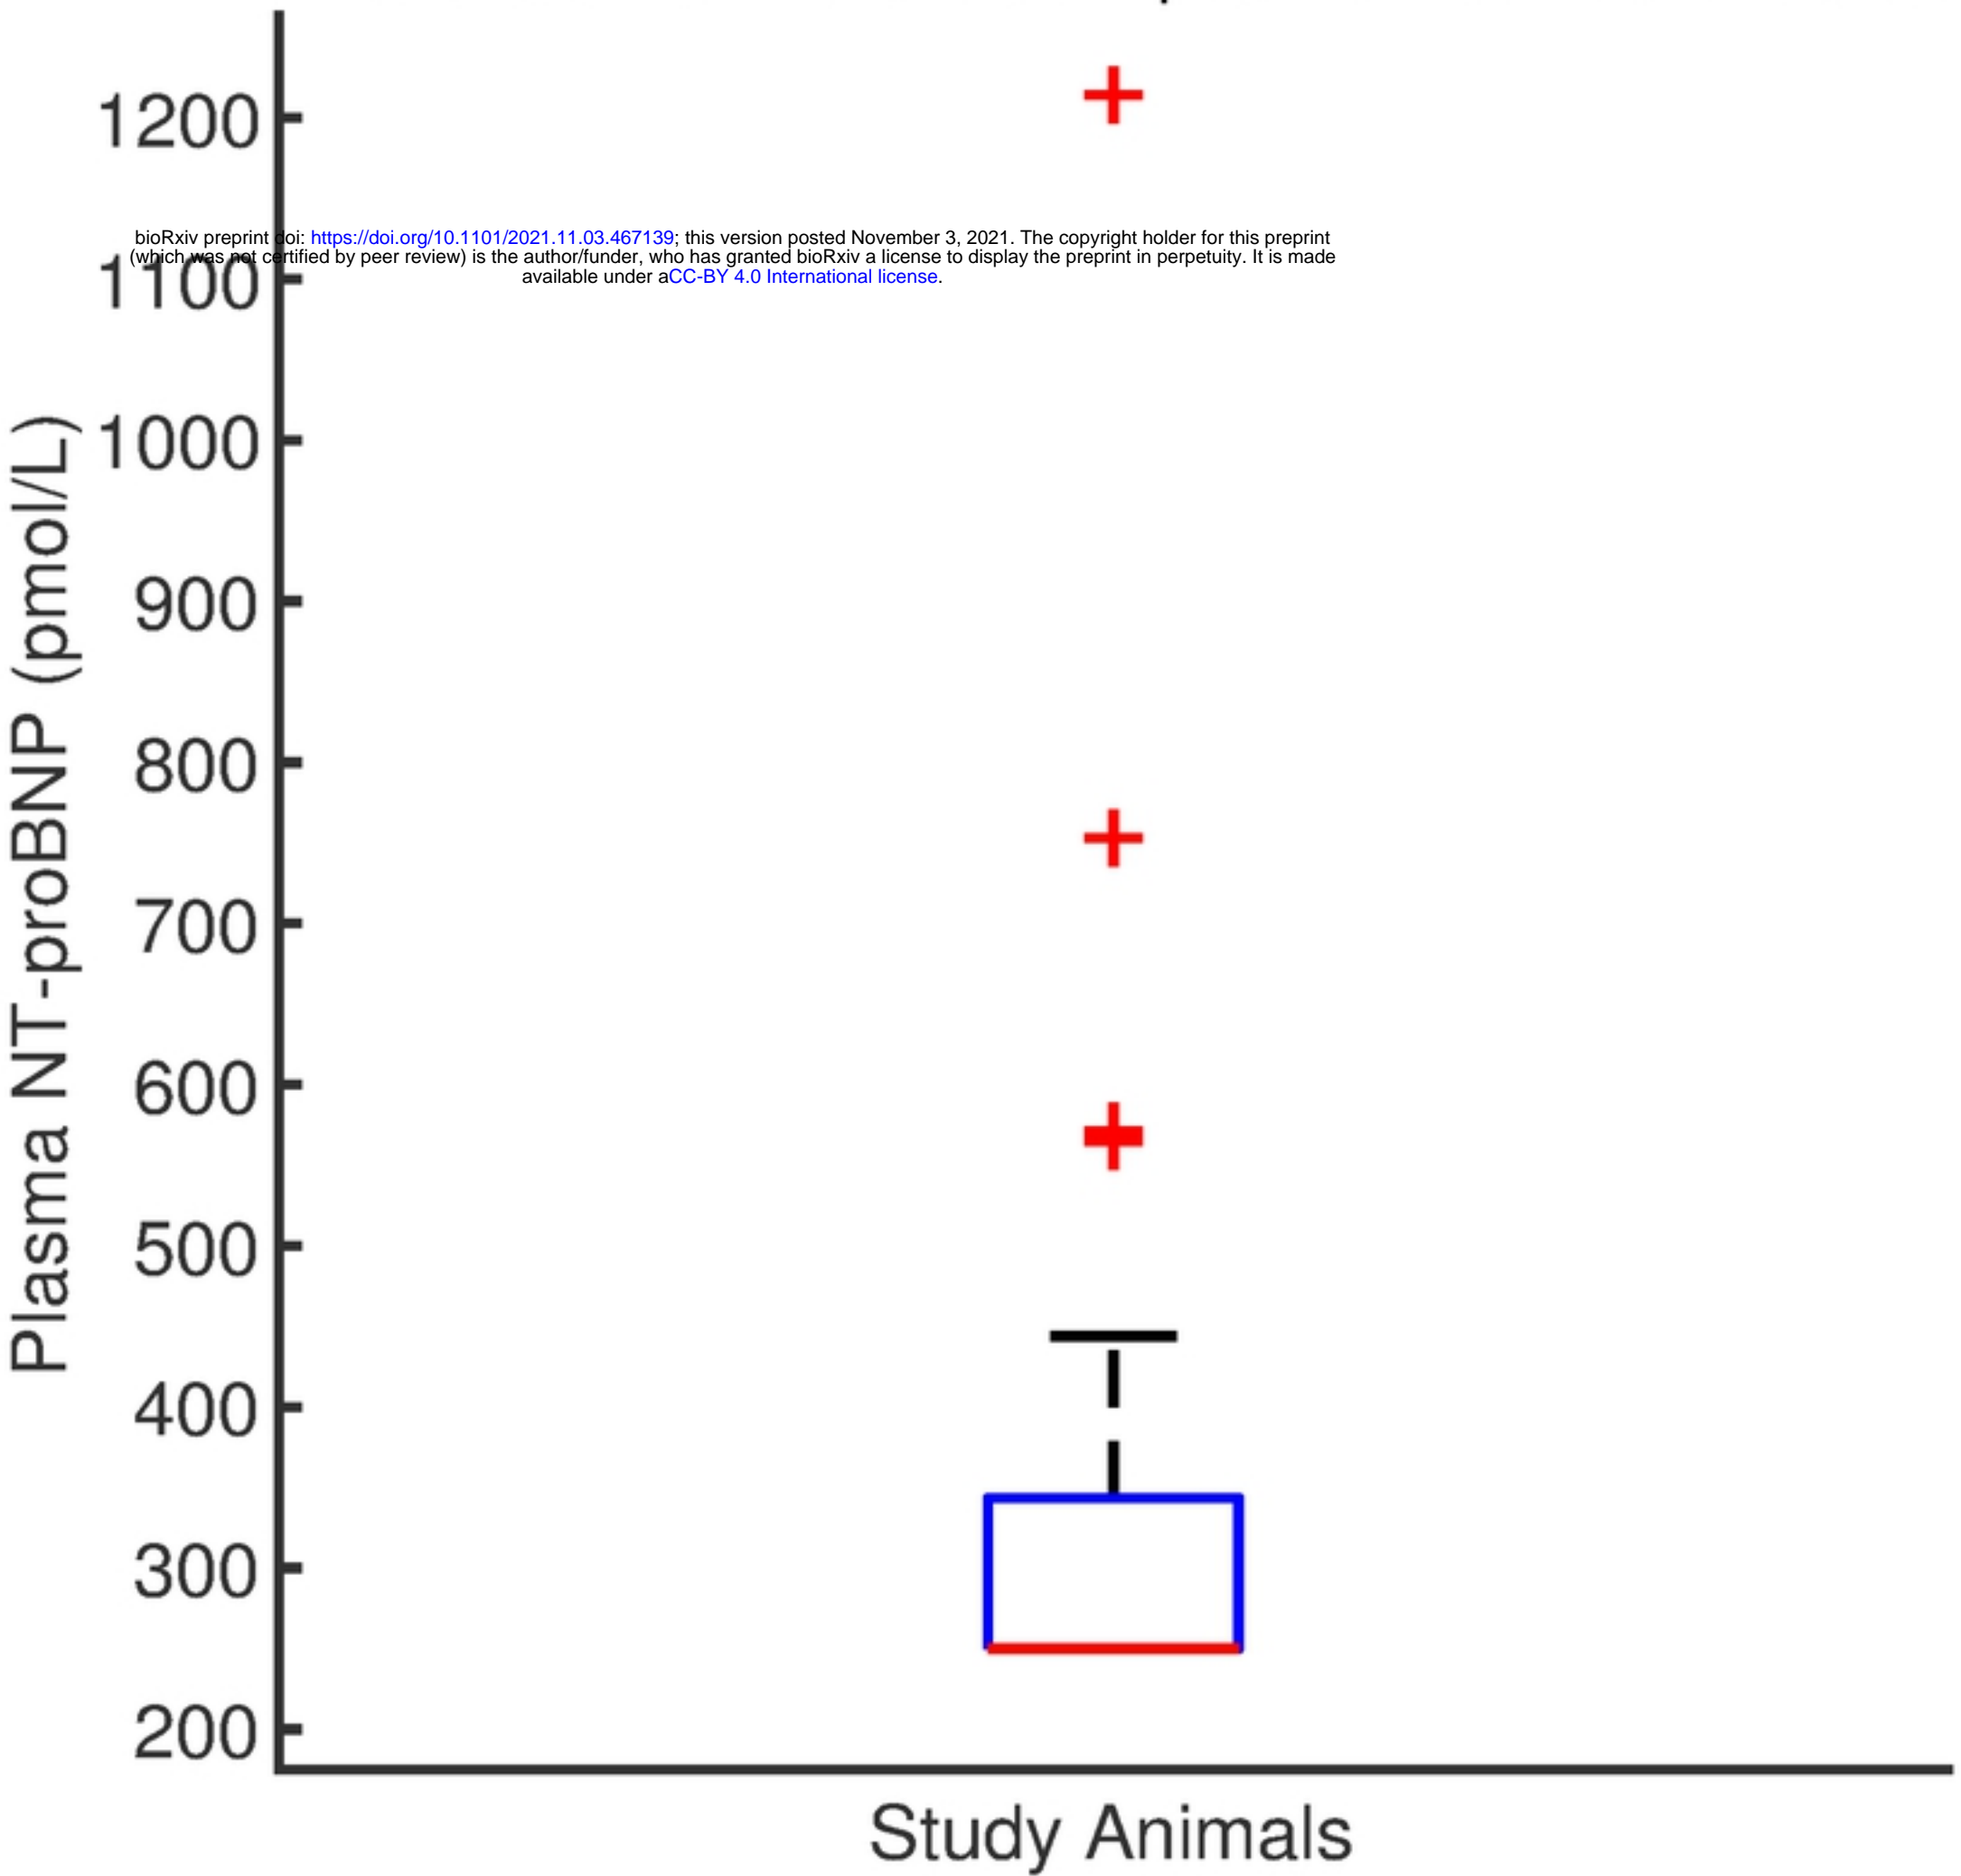

Figure 1
